# Supplementary material
Source: publisher figshare collection journal article supplement (https://springernature.figshare.com/ndownloader/files/23948005)
Supplement: Supplementary file 1 [file 23948005]

## **Isotopic composition of lead white pigments on qeros: Implications for the chronology and production of Andean ritual drinking vessels during the colonial era**

Allison N. Curley<sup>1\*†</sup>, Alyson M. Thibodeau<sup>1‡</sup>, Emily C. Kaplan<sup>2</sup>, Ellen Howe<sup>3</sup>, Ellen Pearlstein<sup>4</sup>, Judith Levinson<sup>5</sup>

<sup>1</sup>Department of Earth Sciences, Dickinson College, P.O. Box 1773, Carlisle, PA, 17013, USA

<sup>2</sup>Smithsonian National Museum of the American Indian, 4220 Silver Hill Road, Suitland, Maryland 20746, USA

<sup>3</sup>Metropolitan Museum of Art, 1000 Fifth Avenue, NY, NY 10028, USA

<sup>4</sup>UCLA Information Studies and UCLA/Getty Program in Conservation of Archaeological and Ethnographic Materials, A410 Fowler, Los Angeles, California 90065, USA

<sup>5</sup>American Museum of Natural History, 200 Central Park West, NY, NY 10024, USA

\*Present address: Department of Earth and Environmental Sciences, University of Michigan, 1100 North University Avenue, Ann Arbor, MI, 48109, USA

†corresponding author: [ancurley@umich.edu](mailto:ancurley@umich.edu)

‡ corresponding author: [thibodea@dickinson.edu](mailto:thibodea@dickinson.edu)

Additional File 4: Lead isotope compositions of lead white pigments from colonial qeros compared to Andean and European/Mediterranean ores.

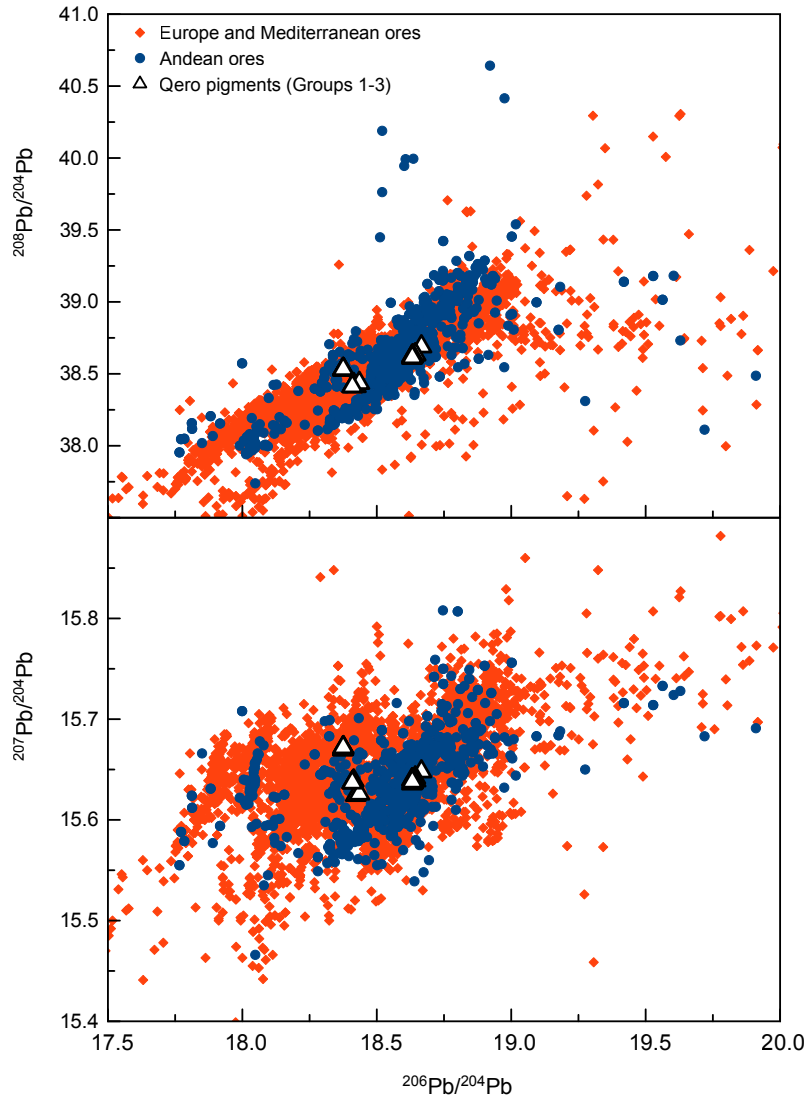

**Fig. S3.** Lead isotope compositions of lead white pigments from colonial qeros compared to Andean and European/Mediterranean ores deposits. Note that all lead white pigments fall within range of both Andean and European/Mediterranean ores. Data from Andean ores and European/Mediterranean ores derive from the database compiled by Killick et al. [1]. Symbols are larger than errors.

## References

1. Killick D, Stephens J, Fenn TR. Geological constraints on the use of lead isotopes for provenance in archaeometallurgy. *Archaeometry*. 2020; doi: 10.1111/arc.12573.
